# Supplementary material
Source: PubMed Central journal article supplement (PMC2922216)
Supplement: 1001957107_pnas.201001957SI.pdf [file 1001957107_pnas.201001957SI.pdf]

# Supporting Information

Verbruggen et al. 10.1073/pnas.1001957107

## SI Text

**Mean Coordinates for the Three Sites.** The mean coordinates for each site are presented in [Table S1](#).

**Estimation of Stop-Signal Reaction Time.** When the tracking procedure is used, the covert latency of the stop process (stop-signal reaction time; SSRT) can be estimated by subtracting the mean delay between the stop signal and go signal (SOA) from the mean go reaction time (goRT). However, this mean estimation method assumes that the probability of responding on a stop-signal trial is 0.50. Inspection of the data of each subject showed that this was not the case for all windows (average = 0.514, SD = 0.038, range: 0.41–0.72). Therefore, we used the integration method to estimate SSRT (see ref. 1 for a detailed discussion of the various estimation methods). SSRT was estimated by subtracting mean SOA from the finishing time of the stop process. The finishing time was determined by integrating the goRT distribution: RTs were rank-ordered, then the  $n$ th RT was selected, where  $n$  was obtained by multiplying the number of no-signal trials in the distribution by the probability of responding. For example, there were 72 no-signal trials per window; when  $P(\text{respond}|\text{signal}) = 0.42$ , then  $n$ th RT was the 30th fastest RT. To estimate SSRT, mean SOA was subtracted from the  $n$ th RT. We excluded trials on which subjects erroneously executed a dual response; such trials were considered incorrect dual-response trials (see error analyses below) rather than signal-respond trials.

Mean  $P(\text{respond}|\text{signal})$  and mean SOA for each site are presented in [Table S2](#).

**Linear Mixed Effect Models and Analyses of Switch Trials.** We used linear mixed effects models to analyze the following behavioral measures:

- (i) Latency of the stop process on stop-signal trials (SSRT)
- (ii) Latency of the dual-response on dual-signal trials (DRT2)

- (iii) The interaction between DRT2 and SOA (i.e., the delay between the go and dual signals)
- (iv) Latency of the first response on dual-signal trials (DRT1)
- (v) Slowing on signal-ignore trials (RT signal-ignore trials minus goRT ignore no-signal trials)
- (vi) Latency of color response (goRT) on no-signal trials (context-repetitions only)
- (vii) Switch cost for no-signal trials (i.e., goRT Trial 1 of a run minus goRT Trial 2 of a run)

For each behavioral measure, we adopted the top-down model building approach for fitting LME models (2, 3). We started with a full model of the fixed effects (see also Materials and Methods). We then added the random effects that were necessary and determined the best pattern for the covariance of the residuals based on Restricted Maximum Likelihood estimation (REML estimation). Then we determined which fixed effects we needed to include based on Maximum Likelihood estimation (ML estimation; see ref. 2 for a discussion of when to use REML and ML estimations). Fixed effects were removed when the model with the fixed effect did not fit the data significantly better than the model without the fixed effect. When the fixed effects were determined, we refitted the final model with REML estimation and calculated the relevant contrasts.

For each behavioral measure, we present the three fitting steps below. For each fitted model, we present the log-likelihood (Log L.) of the model, the  $\chi^2$  for the relevant model comparison, and the corresponding  $p$  value for this model test. The final (contrast) table for each measure always shows the Intercept (in ms; the Intercept value corresponds to the value for Sham at the first time window). When the main effect of moment was significant, the table shows the increase (in ms) per moving window. When the main effect of cTBS site was significant, the table shows the difference between each site and the Intercept (thus, there are three contrasts: rIFG vs. Sham, rIFJ vs. Sham, and preSMA vs. Sham).

**Stop Latency on Stop-Signal Trials (SSRT).** SSRTs for each moving window and each site are presented in [Fig. S1](#).

### Step1. Determine random structure and covariance structure

| Model | Test                                  | Random     | Covariance | Log L. | Df | $\chi^2$             | $P$     |
|-------|---------------------------------------|------------|------------|--------|----|----------------------|---------|
| 1     | Initial REML fit                      | 1          |            | -6516  | 10 |                      |         |
| 2     | Random moment<br>(1 vs. 2)            | 1 + moment |            | -6476  | 12 | $\chi^2(1.5) = 80.7$ | <0.0001 |
| 3     | Autoregressive<br>structure (2 vs. 3) | 1 + moment | AR         | -5546  | 13 | $\chi^2(1) = 1860$   | <0.0001 |

Decision test model 2: add random moment; decision test model 3: use autoregressive (AR) structure.

### Step2. Determine fixed effects

| Model | Test                            | Fixed         | Log L. | Df | $\chi^2$            | $P$     |
|-------|---------------------------------|---------------|--------|----|---------------------|---------|
| 1     | Initial ML fit                  | Site x moment | -5556  | 13 |                     |         |
| 2     | Remove interaction<br>(1 vs. 2) | Site + moment | -5558  | 10 | $\chi^2(3) = 3.41$  | 0.33    |
| 3     | Remove site<br>(2 vs. 3)        | Moment        | -5570  | 7  | $\chi^2(3) = 24.84$ | <0.0001 |
| 4     | Remove moment<br>(2 vs. 4)      | Site          | -5561  | 9  | $\chi^2(1) = 6.90$  | <0.01   |

Decision test model 2: remove interaction; decision test model 3: keep site; decision test model 4: keep moment.

### Step 3. Test final model

| Effects | <i>F</i>           |  | <i>P</i> |
|---------|--------------------|--|----------|
| Moment  | $F(1,1343) = 7.37$ |  | <0.01    |
| Site    | $F(3,1343) = 8.37$ |  | 0.0001   |

  

| Contrasts    | <i>B</i> | <i>SE(B)</i> | <i>t</i>          | <i>P</i> |
|--------------|----------|--------------|-------------------|----------|
| Intercept    | 268.19   | 8.69         | $t(1346) = 30.83$ | <0.0001  |
| Moment       | 0.78     | 0.28         | $t(1346) = 2.75$  | <0.01    |
| Site: IFG    | 11.01    | 3.56         | $t(1346) = 3.09$  | <0.01    |
| Site: IFJ    | 15.47    | 5.28         | $t(1346) = 2.92$  | <0.01    |
| Site: preSMA | 4.64     | 6.99         | $t(1346) = 0.66$  | 0.50     |

Note: We did not only test the regular interaction. We also tried more sophisticated approaches, such as polynomial regression or 'broken-stick regression' (regression using splines). Broken-stick regression allows the size of the effect to differ across different time points (with two sticks, the effect could differ for the first and second part of the experiment, with three sticks, the effect could differ for the early, middle and late phase of the session, and so on...). We compared two-stick, three-stick and four-stick models with the basic model that we presented above. Even though these stick models were more complicated, they did not improve the fits.

**Dual-Response Latency on Dual-Signal Trials (DRT2).** DRT2 for each moving window and each site is presented in Fig. S2.

#### Step1. Determine random structure and covariance structure

| Model | Test                                  | Random     | Covariance | Log L. | Df | $\chi^2$             | <i>P</i> |
|-------|---------------------------------------|------------|------------|--------|----|----------------------|----------|
| 1     | Initial REML fit                      | 1          |            | -6596  | 10 |                      |          |
| 2     | Random moment<br>(1 vs. 2)            | 1 + moment |            | -6593  | 12 | $\chi^2(1.5) = 5.70$ | <0.05    |
| 3     | Autoregressive<br>structure (2 vs. 3) | 1 + moment | AR         | -5498  | 13 | $\chi^2(1) = 2189$   | <0.0001  |

Decision test model 2: add random moment; decision test model 3: use autoregressive (AR) structure.

#### Step2. Determine fixed effects

| Model | Test                            | Fixed         | Log L. | Df | $\chi^2$            | <i>P</i> |
|-------|---------------------------------|---------------|--------|----|---------------------|----------|
| 1     | Initial ML fit                  | Site x moment | -5509  | 13 |                     |          |
| 2     | Remove interaction<br>(1 vs. 2) | Site + moment | -5510  | 10 | $\chi^2(3) = 2.47$  | 0.48     |
| 3     | Remove site<br>(2 vs. 3)        | Moment        | -5524  | 7  | $\chi^2(3) = 27.33$ | <0.0001  |
| 4     | Remove moment<br>(2 vs. 4)      | Site          | -5514  | 9  | $\chi^2(1) = 7.76$  | <0.01    |

Decision test model 2: remove interaction; decision test model 3: keep site; decision test model 4: keep moment.

#### Step 3. Test final model

| Effects | <i>F</i>           |  | <i>P</i> |
|---------|--------------------|--|----------|
| Moment  | $F(1,1346) = 9.53$ |  | <0.01    |
| Site    | $F(3,1346) = 9.23$ |  | <0.0001  |

  

| Contrasts    | <i>B</i> | <i>SE(B)</i> | <i>t</i>          | <i>p</i> |
|--------------|----------|--------------|-------------------|----------|
| Intercept    | 490.92   | 13.22        | $t(1346) = 37.12$ | <0.0001  |
| Moment       | 0.74     | 0.26         | $t(1346) = 2.90$  | <0.01    |
| Site: IFG    | 11.65    | 3.74         | $t(1346) = 3.02$  | <0.01    |
| Site: IFJ    | 15.75    | 6.19         | $t(1346)=2.54$    | < 0.05   |
| Site: preSMA | 4.8      | 8.53         | $t(1346)=0.56$    | 0.57     |

**SOA-DRT2 Analyses for rIFG and rIFJ.** The main analysis for dual-response RTs indicated that there was no effect of preSMA stimulation. Therefore, we excluded preSMA from the follow-up SOA analysis.

In the Fig. 6, SOA = 250 ms was included. We did not include SOA 250 ms in the SOA analyses because this SOA was intermediate and could therefore not help to distinguish between the different hypotheses. We note however that the crucial interaction between site and SOA remained significant when this intermediate SOA was included [ $F(1,3043) = 15.2, P < 0.001$ ].\*

### Step 1. Determine random structure and covariance structure

| Model | Test                               | Random     | Covariance | Log L. | Df | $\chi^2$            | <i>P</i> |
|-------|------------------------------------|------------|------------|--------|----|---------------------|----------|
| 1     | Initial REML fit                   | 1          |            | -10565 | 14 |                     |          |
| 2     | Random moment (1 vs. 2)            | 1 + moment |            | -10563 | 16 | $\chi^2(1.5) = 4.8$ | <0.05    |
| 3     | Autoregressive structure (2 vs. 3) | 1 + moment | AR         | -10551 | 17 | $\chi^2(1) = 23.6$  | <0.001   |

Decision test Model 2: add random moment.

Decision test Model 3: use autoregressive (AR) structure.

### Step 2. Determine fixed effects

| Model | Test                                            | Fixed                       | Log L. | Df | $\chi^2$           | <i>P</i> |
|-------|-------------------------------------------------|-----------------------------|--------|----|--------------------|----------|
| 1     | Initial ML fit                                  | Site x moment x SOA         | -10564 | 17 |                    |          |
| 2     | Remove three-way interaction (1 vs. 2)          | (Site + context + moment)^2 | -10565 | 15 | $\chi^2(2) = 2.2$  | 0.32     |
| 3     | Remove site x moment interaction (2 vs. 3)      |                             | -10565 | 13 | $\chi^2(2) = 0.24$ | 0.88     |
| 4     | Remove site x SOA interaction (2 vs. 4)         |                             | -10583 | 13 | $\chi^2(2) = 40.0$ | <0.0001  |
| 5     | Remove SOA x moment interaction (2 vs. 5)       |                             | -10565 | 14 | $\chi^2(1) = 0.46$ | 0.49     |
| 6     | Remove SOA x moment and site x moment (2 vs. 6) | Site + SOA + moment         | -10565 | 12 | $\chi^2(3) = 0.7$  | 0.87     |
| 7     | Remove moment (6 vs. 7)                         | Site + SOA                  | -10568 | 11 | $\chi^2(1) = 6.1$  | <0.05    |

Decision test model 2: remove interaction; decision test model 3: remove interaction; decision test model 4: keep site x SOA interaction; decision test model 5: remove interaction; decision test model 6: remove interactions; decision test model 7: keep moment.

We did not test models without fixed effects for site and SOA because there was a fixed effect for two-way interaction between SOA x site.

### Step 3. Test final model

| Effects   | <i>F</i>             | <i>P</i> |
|-----------|----------------------|----------|
| Moment    | $F(1,2028) = 7.6$    | <0.01    |
| Site      | $F(2,2028) = 13.5$   | <0.0001  |
| SOA       | $F(1,2028) = 4268.5$ | <0.0001  |
| Site: SOA | $F(1,2028) = 18.9$   | <0.0001  |

  

| Contrasts | <i>B</i> | SE( <i>B</i> ) | <i>t</i>          | <i>P</i> |
|-----------|----------|----------------|-------------------|----------|
| Intercept | 569      | 12.7           | $t(2028) = 37.12$ | <0.0001  |
| Moment    | 0.60     | 0.23           | $t(2028) = 2.6$   | <0.01    |
| SOA: 400  | -111.4   | 2.8            | $t(2028) = 39.5$  | <0.0001  |
| Site: IFG | 8.8      | 3.17           | $t(2028) = 2.7$   | <0.01    |
| Site: IFJ | 3.1      | 3.17           | $t(2028) = 0.98$  | 0.39     |
| IFG: SOA  | -3.3     | 3.99           | $t(2028) = 0.84$  | 0.40     |
| IFJ: SOA  | 19.30    | 3.98           | $t(2028) = 4.85$  | <0.0001  |

**Latency for First Response on Dual-Signal Trials (DRT1).** DRT1 for each moving window and each site is presented in Fig. S3.

### Step 1. Determine random structure and covariance structure

| Model | Test                               | Random     | Covariance | Log L. | Df | $\chi^2$              | <i>P</i> |
|-------|------------------------------------|------------|------------|--------|----|-----------------------|----------|
| 1     | Initial REML fit                   | 1          |            | -5876  | 10 |                       |          |
| 2     | Random moment (1 vs. 2)            | 1 + moment |            | -5869  | 12 | $\chi^2(1.5) = 13.58$ | <0.001   |
| 3     | Autoregressive structure (2 vs. 3) | 1 + moment | AR         | -5058  | 13 | $\chi^2(1) = 1621$    | <0.0001  |

Decision test model 2: add random moment; decision test model 3: use autoregressive (AR) structure.

\*We also note that the average of the estimates reported in this analysis do not fully correspond to the reported estimates in the main analyses (see *SI Text*; see also comparison of A and B with C in Fig. 6 in the main text). This is expected because LME estimates were based on different numbers of trials per condition in the two analyses (i.e., we collapsed across all SOAs in the main analysis) and because different predictors were included in the final models (i.e., the fixed effect for SOA and the interaction between SOA and site were included only in this analysis).

**Step 2. Determine fixed effects**

| Model | Test                         | Fixed         | Log L. | Df | $\chi^2$           | P     |
|-------|------------------------------|---------------|--------|----|--------------------|-------|
| 1     | Initial ML fit               | Site x moment | -5056  | 13 |                    |       |
| 2     | Remove interaction (1 vs. 2) | Site + moment | -5066  | 10 | $\chi^2(3) = 0.82$ | 0.84  |
| 3     | Remove site (2 vs. 3)        | Moment        | -5070  | 7  | $\chi^2(3) = 7.75$ | 0.05  |
| 4     | Remove moment (2 vs. 4)      | Site          | -5069  | 9  | $\chi^2(1) = 5.61$ | <0.05 |

Decision test model 2: remove interaction; decision test model 3: keep site; decision test model 4: keep moment.

**Step 3. Test final model**

| Effects | F                  | P     |
|---------|--------------------|-------|
| Moment  | $F(1,1346) = 9.68$ | <0.01 |
| Site    | $F(3,1346) = 2.59$ | 0.05  |

| Contrasts    | B      | SE(B) | t                 | P       |
|--------------|--------|-------|-------------------|---------|
| Intercept    | 446.71 | 7.15  | $t(1346) = 62.43$ | <0.0001 |
| Moment       | 0.46   | 0.19  | $t(1346) = 2.46$  | <0.05   |
| Site: IFG    | -4.66  | 2.27  | $t(1346) = -2.05$ | <0.05   |
| Site: IFJ    | -8.05  | 3.13  | $t(1346) = -2.56$ | <0.05   |
| SITE: preSMA | -6.08  | 3.98  | $t(1346) = -1.52$ | 0.13    |

**Ignore Slowing on Signal-Ignore Trials.** Ignore slowing for each moving window and each site is presented in [Fig. S4](#).

**Step 1. Determine random structure and covariance structure**

| Model | Test                                                         | Random     | Covariance | Log L. | Df | $\chi^2$              | P       |
|-------|--------------------------------------------------------------|------------|------------|--------|----|-----------------------|---------|
| 1     | Initial REML fit                                             | 1          |            | -5684  | 10 |                       |         |
| 2     | Random moment (1 vs. 2)                                      | 1 + moment |            | -5561  | 12 | $\chi^2(1.5) = 58.04$ | <0.0001 |
| 3     | Autoregressive structure (2 vs. 3)                           | 1 + moment | AR         | No fit | -  | -                     | -       |
| 4     | Remove random moment, use autoregressive structure (1 vs. 4) | 1          | AR         | -5131  | 11 | $\chi^2(1) = 1111$    | <0.0001 |

Decision test model 2: add random moment; decision test model 3: N/A; decision test model 4: use autoregressive (AR) structure.

**Step 2. Determine fixed effects**

| Model | Test                         | Fixed          | Log L. | Df | $\chi^2$           | P     |
|-------|------------------------------|----------------|--------|----|--------------------|-------|
| 1     | Initial ML fit               | Site x moment  | -5138  | 11 |                    |       |
| 2     | Remove interaction (1 vs. 2) | Site + moment  | -5139  | 8  | $\chi^2(3) = 1.25$ | 0.74  |
| 3     | Remove site (2 vs. 3)        | Moment         | -5139  | 5  | $\chi^2(3) = 1.33$ | 0.72  |
| 4     | Remove moment (3 vs. 4)      | Intercept only | -5141  | 4  | $\chi^2(1) = 3.91$ | <0.05 |

Decision test model 2: remove interaction; decision test model 3: remove site; decision test model 4: keep moment.

**Step 3. Test final model**

| Effects | F                  | P     |
|---------|--------------------|-------|
| Moment  | $F(1,1349) = 3.91$ | <0.05 |

| Contrasts | B     | SE(B) | t                 | P      |
|-----------|-------|-------|-------------------|--------|
| Intercept | 4.57  | 1.34  | $t(1349) = 3.39$  | <0.001 |
| Moment    | -0.15 | 0.078 | $t(1346) = -1.97$ | <0.05  |

**Latency No-Signal Response (goRT) for No-Signal Repetition Trials.** goRT data for each moving window and each site are presented in Fig. S5.

**Step 1. Determine random structure and covariance structure**

| Model | Test                               | Random     | Covariance | Log L. | Df | $\chi^2$              | P       |
|-------|------------------------------------|------------|------------|--------|----|-----------------------|---------|
| 1     | Initial REML fit                   | 1          |            | -18763 | 26 |                       |         |
| 2     | Random moment (1 vs. 2)            | 1 + moment |            | -18739 | 28 | $\chi^2(1.5) = 48.75$ | <0.0001 |
| 3     | Autoregressive structure (2 vs. 3) | 1 + moment | AR         | -18644 | 29 | $\chi^2(1) = 189.85$  | <0.0001 |

Decision test model 2: add random moment; decision test model 3: use autoregressive (AR) structure.

**Step 2. Determine fixed effects**

| Model | Test                                          | Fixed                       | Log L. | Df | $\chi^2$             | P       |
|-------|-----------------------------------------------|-----------------------------|--------|----|----------------------|---------|
| 1     | Initial ML fit                                | Site x context x moment     | -18653 | 29 |                      |         |
| 2     | Remove three-way interaction (1 vs. 2)        | (Site + context + moment)^2 | -18660 | 23 | $\chi^2(6) = 13.06$  | 0.042*  |
| 3     | Remove site x moment interaction (2 vs. 3)    |                             | -18662 | 20 | $\chi^2(3) = 4.19$   | 0.24    |
| 4     | Remove site x context interaction (2 vs. 4)   |                             | -18662 | 17 | $\chi^2(6) = 3.90$   | 0.68    |
| 5     | Remove context x moment interaction (2 vs. 5) |                             | -18662 | 21 | $\chi^2(2) = 4.22$   | 0.12    |
| 6     | Remove all two-way interactions (2 vs. 6)     | Site + context + moment     | -18666 | 12 | $\chi^2(11) = 12.33$ | 0.33    |
| 7     | Remove moment (6 vs. 7)                       | Site + context              | -18674 | 11 | $\chi^2(1) = 16.92$  | <0.0001 |
| 8     | Remove site (6 vs. 8)                         | Context + moment            | -18674 | 9  | $\chi^2(3) = 16.29$  | <0.01   |
| 9     | Remove context (6 vs. 9)                      | Site + moment               | -19757 | 10 | $\chi^2(2) = 2182$   | <0.0001 |

Decision test model 2: remove interaction; decision test model 3: remove interaction; decision test model 4: remove interaction; decision test model 5: remove interaction; decision test model 6: remove interactions; decision test model 7: keep moment; decision test model 8: keep site; decision test model 9: keep context. \*Even though the three-way interaction was significant, it was not analyzed any further because none of the two-way interactions were significant.

**Step 3. Test final model**

| Effects | F                   | P       |
|---------|---------------------|---------|
| Context | $F(2,4080) = 1705$  | <0.0001 |
| Moment  | $F(1,4080) = 26.66$ | <0.0001 |
| Site    | $F(3,4080) = 5.46$  | <0.001  |

  

| Contrasts     | B      | SE(B) | t                 | P       |
|---------------|--------|-------|-------------------|---------|
| Intercept     | 419.49 | 4.68  | $t(4080) = 89.56$ | <0.0001 |
| Context: dual | 12.88  | 0.76  | $t(4080) = 16.74$ | <0.0001 |
| Context: stop | 43.76  | 0.77  | $t(4080) = 56.82$ | <0.0001 |
| Moment        | 0.74   | 0.14  | $t(4080) = 5.15$  | <0.0001 |
| Site: IFG     | -3.15  | 1.26  | $t(4080) = -2.50$ | <0.05   |
| Site: IFJ     | -4.95  | 1.26  | $t(4080) = -3.92$ | <0.001  |
| SITE: preSMA  | -3.53  | 1.26  | $t(4080) = -2.79$ | <0.01   |

**Switch Cost for No-Signal Trials.** Context-switch costs for each moving window and each site are presented in Fig. S6.

**Step 1. Determine random structure and covariance structure**

| Model | Test                               | Random     | Covariance | Log L. | Df | $\chi^2$              | P       |
|-------|------------------------------------|------------|------------|--------|----|-----------------------|---------|
| 1     | Initial REML fit                   | 1          |            | -20202 | 26 |                       |         |
| 2     | Random moment (1 vs. 2)            | 1 + moment |            | -20182 | 28 | $\chi^2(1.5) = 39.95$ | <0.0001 |
| 3     | Autoregressive structure (2 vs. 3) | 1 + moment | AR         | -18266 | 29 | $\chi^2(1) = 3832$    | <0.0001 |

Decision test model 2: add random moment; decision test model 3: use autoregressive (AR) structure.

## Step 2. Determine fixed effects

| Model | Test                                          | Fixed                       | Log L. | Df | $\chi^2$            | P       |
|-------|-----------------------------------------------|-----------------------------|--------|----|---------------------|---------|
| 1     | Initial ML fit                                | Site x context x moment     | -18329 | 29 |                     |         |
| 2     | Remove three-way interaction (1 vs. 2)        | (Site + context + moment)^2 | -18332 | 23 | $\chi^2(6) = 4.48$  | 0.61    |
| 3     | Remove site x moment interaction (2 vs. 3)    |                             | -18333 | 20 | $\chi^2(3) = 2.81$  | 0.42    |
| 4     | Remove site x context interaction (2 vs. 4)   |                             | -18335 | 17 | $\chi^2(6) = 5.54$  | 0.47    |
| 5     | Remove context x moment interaction (2 vs. 5) |                             | -18332 | 21 | $\chi^2(2) = 0.55$  | 0.75    |
| 6     | Remove all two-way interactions (2 vs. 6)     | Site + context + moment     | -18336 | 12 | $\chi^2(11) = 8.44$ | 0.67    |
| 7     | Remove moment (6 vs. 7)                       | Site + context              | -18336 | 11 | $\chi^2(1) = 0.81$  | 0.36    |
| 8     | Remove site (7 vs. 8)                         | Context                     | -18338 | 8  | $\chi^2(3) = 3.69$  | 0.29    |
| 9     | Remove context                                | Intercept only              | -18388 | 6  | $\chi^2(2) = 99.41$ | <0.0001 |

Decision test model 2: remove interaction; decision test model 3: remove interaction; decision test model 4: remove interaction; decision test model 5: remove interaction; decision test model 6: remove interactions; decision test model 7: remove moment; decision test model 8: remove site; decision test model 9: keep context.

## Step 3. Test final model

| Effects | F                   | P       |
|---------|---------------------|---------|
| Context | $F(2,4084) = 50.37$ | <0.0001 |

| Contrasts     | B     | SE(B) | t                | P       |
|---------------|-------|-------|------------------|---------|
| Intercept     | 15.72 | 2.32  | $t(4084) = 6.76$ | <0.0001 |
| Context: dual | 12.62 | 2.03  | $t(4084) = 6.20$ | <0.0001 |
| Context: stop | 21.4  | 2.14  | $t(4084) = 9.97$ | <0.0001 |

**Error Data** Due to multiple empty cells, error rates were too low to warrant inferential statistical analyses. Table S3 lists the percentage of incorrect responses on no-signal trials (go errors; e.g., when subjects pressed the left key instead of a right

key), missed responses on no-signal trials (go misses), incorrectly stopped responses on signal-ignore trials and dual-signal trials, and incorrect dual responses on signal-ignore and stop-signal trials.

1. Verbruggen F, Logan GD (2009) Models of response inhibition in the stop-signal and stop-change paradigms. *Neurosci Biobehav Rev* 33:647–661.
2. Pinheiro JC, Bates DM (2000) *Mixed-Effects Models in S and S-PLUS* (Springer, New York).

3. West BT, Welch KB, Galecki AT (2007) *Linear Mixed Models: A Practical Guide Using Statistical Software* (Chapman Hall/CRC, Boca Raton, FL).

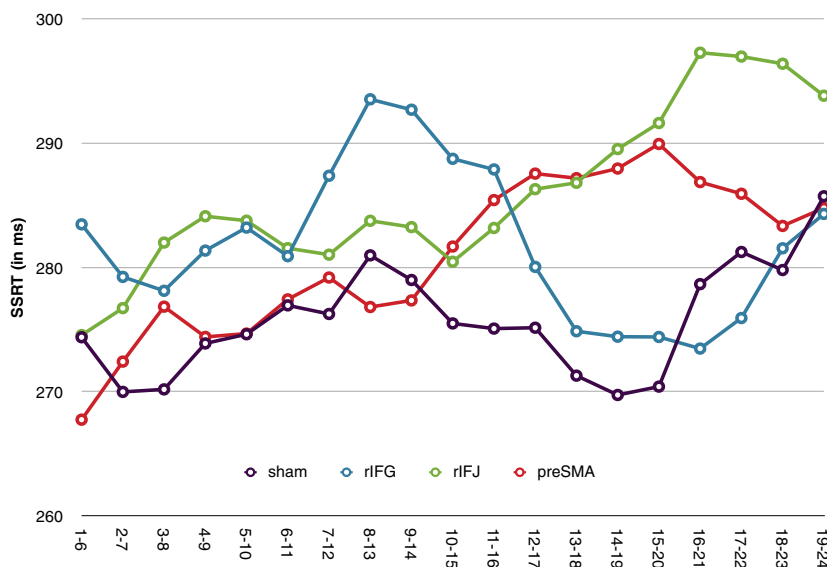

**Fig. S1.** Stop-signal latency (SSRT) for each moving window (6 blocks per window) and each site. SE of means: Sham = 10 ms, rIFG = 11 ms, rIFJ = 12 ms, preSMA = 10 ms. SE of LME difference scores: Sham-rIFG = 3.56 ms, Sham-rIFJ = 5.28 ms, Sham-preSMA = 6.99 ms.







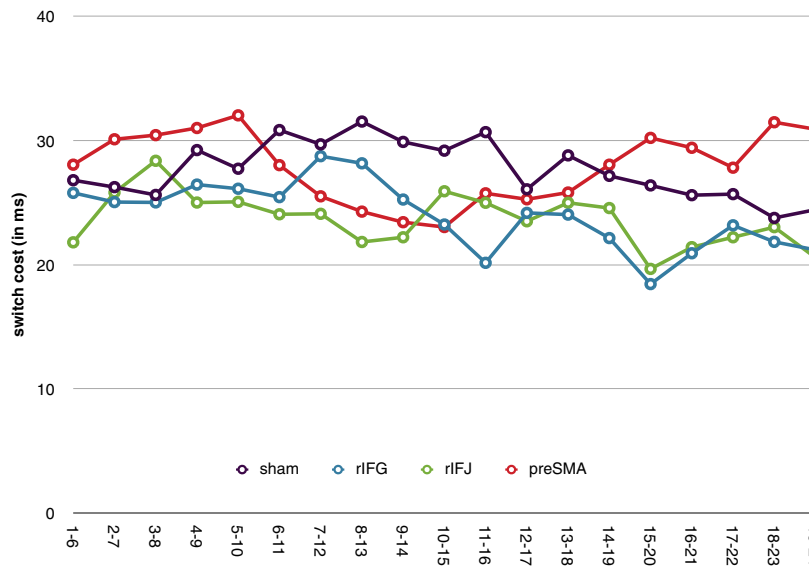

**Fig. 56.** Context-switch costs (goRT trial 1 of run – goRT trial 2 of run) for each moving window (6 blocks per window) and each site. Switch costs are collapsed across contexts. SE of means: Sham = 10 ms, rIFG = 9 ms, rIFJ = 9 ms, preSMA = 9 ms. SE of LME intercept = 2.32.

**Table S1.** Mean coordinates for the three cTBS sites according to the Montreal Neurological Institute (MNI) brain atlas

|        | rIFG |     |     | rIFJ |     |     | preSMA |     |     |
|--------|------|-----|-----|------|-----|-----|--------|-----|-----|
|        | x    | y   | z   | x    | y   | z   | x      | y   | z   |
| Mean   | 58   | 18  | 4   | 56   | 16  | 33  | -1     | 31  | 66  |
| 95% CI | 0.9  | 1.8 | 1.9 | 1.3  | 1.7 | 2.6 | 0.5    | 2.4 | 1.5 |

**Table S2.** Mean and SEM for probability of responding [p(respond | signal)] and SOA collapsed across windows for the four sessions

|        | p(respond signal) | SOA      |
|--------|-------------------|----------|
| Sham   | 0.508 (0.008)     | 202 (12) |
| rIFG   | 0.513 (0.009)     | 194 (12) |
| rIFJ   | 0.521 (0.011)     | 190 (15) |
| preSMA | 0.514 (0.008)     | 195 (13) |

**Table S3.** Mean percentages and SEM collapsed over windows for the different sessions (SEs between parentheses)

|        | Go error  | Go miss       | Incorrect stops |             | Incorrect dual resp. |             |
|--------|-----------|---------------|-----------------|-------------|----------------------|-------------|
|        | No signal | No signal     | Signal ign.     | Dual signal | Signal ign.          | Stop signal |
| Sham   | 2.7 (0.3) | 0.1 (0.1)     | 0.1 (0.1)       | 0.1 (0.1)   | 0.4 (0.3)            | 1.2 (0.5)   |
| rIFG   | 2.7 (0.3) | 0.01 (0.004)  | 0.1 (0.1)       | 0.1 (0.1)   | 0.4 (0.3)            | 1.4 (0.6)   |
| rIFJ   | 3.1 (0.5) | 0.01 (0.005)  | 0.2 (0.3)       | 0.3 (0.2)   | 0.1 (0.2)            | 1.4 (0.5)   |
| preSMA | 3.1 (0.4) | 0.004 (0.003) | 0.2 (0.2)       | 0.1 (0.1)   | 0.5 (0.3)            | 1.8 (0.8)   |
